# Supplementary material
Source: PubMed Central journal article supplement (PMC11028929)

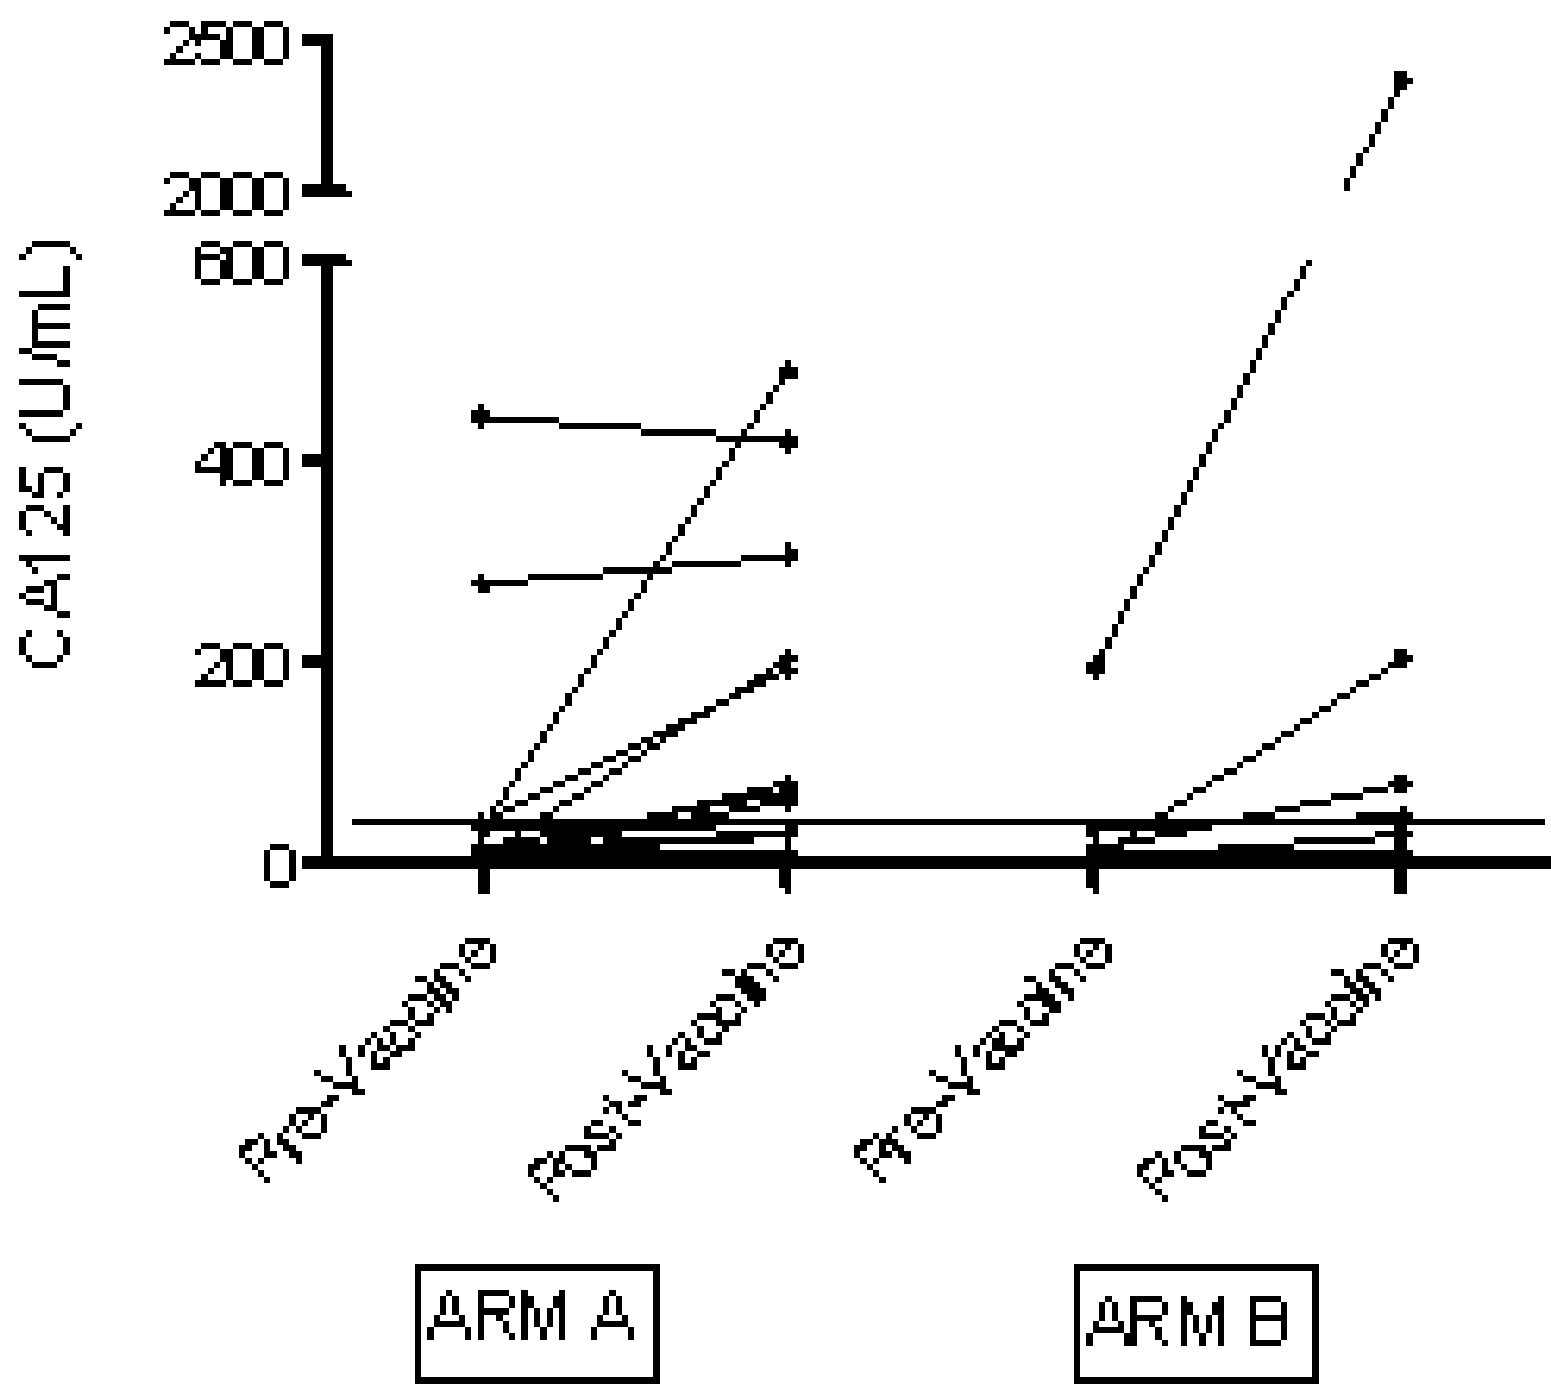

Supplement: 262_2011_1100_MOESM3_ESM.pdf [file 262_2011_1100_MOESM3_ESM.pdf]
